# Supplementary material for: Genome-wide Distribution of AdpA, a Global Regulator for Secondary Metabolism and Morphological Differentiation in Streptomyces, Revealed the Extent and Complexity of the AdpA Regulatory Network
Source: PubMed Central journal article supplement — DNA Res. 2012 Mar 26;19(3):259–74. doi: 10.1093/dnares/dss010 (PMC3372375; doi:10.1093/dnares/dss010), 2012-03-26
Supplement: supp_dss010_dss010supp.pdf [file supp_dss010_dss010supp.pdf]

bacteriophage  $\phi$ C31 attachment site.<sup>2</sup>

### **Streptomycin assay**

The amount of streptomycin produced was measured by a bioassay using *Bacillus subtilis* ATCC 6633 as an indicator.<sup>3</sup>

### **Preparation of total cellular protein from *S. griseus* and western blotting**

For the extraction of total protein from mycelia in liquid culture, cells were harvested by centrifugation, washed twice, resuspended with native buffer (10 mM Tris-HCl, 150 mM NaCl, 10 mM EDTA, and 1 × protease inhibitor cocktail (Roche), pH 7.5), and disrupted with sonication at 4°C. The cell debris was removed by centrifugation. The procedure for extraction of total protein from mycelia on solid culture was as previously described.<sup>1</sup> Proteins were separated by 10% SDS-polyacrylamide gel electrophoresis (PAGE), and blotted onto a polyvinylidene fluoride (PVDF) membrane. His-tagged proteins were detected with penta-His HRP conjugate kit (QIAGEN) and a chemiluminescent kit (SuperSignal West Dura, Pierce).

### **Extraction of total RNA**

Total RNA was isolated according to a previously described method.<sup>1</sup>

### **Microarray hybridization and data analysis**

DNA microarray analysis was performed according to a previously described method.<sup>3</sup>

### **Co-purification of total RNA and genomic DNA**

Two milliliter of cell culture was mixed with 4 ml of RNA protect (Qiagen) and incubated at room temperature for 5 min, then centrifuged. The cell pellet was resuspended in TE containing 20 mg/ml lysozyme and 2 mg/ml proteinase K, and incubated at room temperature for 5 min. Six hundred microliters of denaturing buffer (50 mM Tris-HCl (pH 8.0), 50 mM EDTA, 1% salcosyl and 5 M guanidine thiocyanate),

600 µl of phenol (pH 8.0) and 400 µl of zirconia/silica beads (ϕ 0.1 mm, Biospec) were added to the resuspended cells. Cells were disrupted by vigorously shaking for 2 min and incubation at 65°C for 10 min. Two hundred and eighty microliters of chloroform/isoamyl alcohol was then added and mixed. The liquid was centrifuged to collect the aqueous phase. Then, an equal volume of phenol/chloroform/isoamyl alcohol was added and mixed, and the liquid was centrifuged to collect the aqueous phase. After precipitation by isopropanol, the RNA and DNA pellets were suspended in cetyl trimethyl ammonium bromide (CTAB) buffer (50 mM Tris-HCl (pH 7.5), 10 mM EDTA, 0.8 M NaCl and 1% CTAB). The above-described chloroform/isoamyl alcohol treatment was repeated twice. After the final precipitation by isopropanol, the RNA and DNA pellets were suspended in water.

#### ***In silico* prediction of AdpA-binding sites**

AdpA-binding sites were predicted by MAST<sup>4</sup> motif search algorithm using the AdpA-binding motif built by MEME<sup>4</sup> from known *in vitro* AdpA-binding sequences.<sup>5</sup>

#### **Competitive gel electrophoretic mobility shift assay (EMSA)**

Competitor DNA fragments (130-200 bp) were prepared by PCR using appropriate primer sets. Recombinant AdpA protein with a His-tag at its C terminus was produced in *Escherichia coli* and purified on a Ni-NTA column (Qiagen), as described previously.<sup>6</sup> Two DNA fragments containing the AdpA-binding sites of *sgmA* and *sgiA* were labeled with digoxigenin (DIG) using a DIG DNA labeling kit (Roche) and used as probes.<sup>7</sup> Recombinant AdpA (500 ng) was incubated with DIG-labeled *sgmA*-P and *sgiA*-P (100 pg) in the presence of a competitor DNA fragment (500-fold excess), 1 µg poly(dI-dC)-(dI-dC), and 1 µg BSA for 30 min at room temperature in a buffer (10 µl) containing 50 mM NaH<sub>2</sub>PO<sub>4</sub>, 5 mM Tris ·HCl (pH 8.0) and 10% (v/v) glycerol. The reaction mixture was then subjected to 6% PAGE at 4°C for 1 h

at 120 V in the running buffer  $0.5 \times$  TBE. The DNA was electroblotted onto a Hybond-N+ nylon membrane (GE Healthcare) for 30 min at 100 mA in  $0.5 \times$  TBE buffer. For chemiluminescent detection, anti-DIG (Roche) and CDP-star (NEB) were used.

**Supplemental Table S1.** Primers used in this study.

|                                       | forward (5' to 3')         | reverse (5' to 3')      |
|---------------------------------------|----------------------------|-------------------------|
| <b>*Competitive EMSA (130-200 bp)</b> |                            |                         |
| <b>category-I genes</b>               |                            |                         |
| sgmA_1                                | CTTCGTGCGCGACCTCCT         | ATGACCGCCTGATGAGACA     |
| sgmA_2                                | GTGACCACCCTGTGAATACG       | GCAGATGACCGCACCTGT      |
| amfR_1                                | GTCTCGACGGCATCGAAC         | GGCGTCGACGGGGTGGATT     |
| amfR_2                                | ACATCCGAACGCCCCCTTCC       | AAGCGACGGGCTGTACG       |
| adsA                                  | AGCGTTATTCTCCTCAGACG       | CAGGCCCGAGGCGTCAAC      |
| sprB                                  | ACCGGATCGACGCCTGAC         | CAATCGCTGACCGGAGTATC    |
| sprD                                  | AGGCTCCCGGCGGACGAT         | TTCCGATCGCGAACACTC      |
| strR_1                                | GCTTTCATGTGGTGCTCCT        | TGCCGAATACATGCAACTT     |
| strR_2                                | GCGGGGTGGCCCTCTATTT        | GGGCTTTCACGGCGATAA      |
| AdBS4_1                               | CGACTGGTTCCTCCGGTGCAGAG    | ATCCCGCATGAGCAGCCACA    |
| AdBS4_2                               | CGATCACAGGTGGTCAACAA       | CTGCTTCCGGTGCAGAC       |
| AdBS4_3                               | TGACGGGGTGCCTGAG           | GCACGCCGGCGGTATCC       |
| AsBS2_1                               | GGCCATATCCATACGACCAG       | TCACCGAAGATGAGAATGTTT   |
| AdBS2_2                               | CAGGGCTCGGCGGATG           | AATGAATGGCAATGCCCAAC    |
| <b>up-regulated by AdpA</b>           |                            |                         |
| SGR1                                  | GCAGGGGACTGTCAGTGT         | ACGGGAGACCTTGTGACC      |
| SGR95_1                               | AGTTGCGCATGGCAATTTCT       | TTTCGATGACAGTGCAGCTC    |
| SGR95_2                               | ACGTTCTGTCGACCTGAG         | GCGCTGATGTGTTCCGGTTT    |
| SGR110                                | AGTCTCTGCTGGGAGTCTCTG      | CGGTGAACGTGAGCCTCT      |
| SGR179                                | GTAATGGCGGTCCGTGCT         | GACGGCTTCCAGAATCTTCA    |
| SGR180                                | CCTTCGGGCAGGGACAGC         | CCGTCAGGAATCCACTGTTC    |
| SGR262                                | GACCAACGCCACGACCAC         | CGCTCTGGGACGTTTATA      |
| SGR264                                | CCTGAGCGGATGCGAAC          | CGTCCGCACCTCTCCCAAT     |
| SGR299                                | GTGTACACCCAGTGCCTTC        | AGGGTGCGTGAGCCACCT      |
| SGR381                                | TCCCGGCTCGCCGTGTC          | TGGGTGGCGTGGTGGTG       |
| SGR390                                | CCTTCTCCTCCATGCCTTCT       | ATTGCCGCAACCAGGAG       |
| SGR452_1                              | GGGCGCCGGACTCCTCTC         | CACCGGCAGCAGGTTGTT      |
| SGR452_2                              | GAACCGGCACCGCGTGAG         | GCTAGCGACCTACCCATC      |
| SGR462_1                              | TCTTCGTGCGGTGTTTCC         | ACACCCCGCGCCACAG        |
| SGR462_2                              | GTAGCGTCGCCGACAGATG        | CCCGTACCTCTCAGCAGTAA    |
| SGR598_1                              | GGAACCCCTCCGCAATAC         | TAAGGGAGCAGAGGTTTCGAT   |
| SGR598_2                              | GGATGTGGCCGAAAGTCG         | CGCTGTCGACGGTGTGGA      |
| SGR681                                | CCATTGCTGCCCCGCTTCT        | GGCCGTGGACGGCTGGTC      |
| SGR692                                | CCCCACCCCGCATCC            | CTGGTCGGAACGGAGACTTC    |
| SGR695                                | ATGGGGGCCTCCTTCTCAG        | CCCCCGTGTGGTGCATAC      |
| SGR710_1                              | GCCGGCCGATGAAGACC          | GATCGCACCCGATTACCG      |
| SGR710_2                              | CTTGGCGGCCGATCAGTAG        | ACACGCTTGGCACCGAAAT     |
| SGR731                                | GGCCGGGTTTTCGTTGTA         | AGGACGGTCCGGGAACCT      |
| SGR745                                | CTTGTGATCAGTCACTGTGCGGACCT | GGTGAGCGAGGCACGGTTG     |
| SGR919                                | ATTCGGCCAGGCATCCTT         | ACATGTGTCTGCAAGACCATAAA |
| SGR920                                | ATCACAGGCCGGAATAGTC        | CCAGAGCGTACCACACC       |
| SGR983                                | GGGCCGGGAGATTACTCATA       | CCACCTTCTCTGCCATCAG     |
| SGR1063_1                             | GCCGGTCACGAATCTGCAC        | AAGGAGAAGCAGTGCAGGTC    |
| SGR1063_2                             | CGCTCCTGGTGAATCAATTT       | CAGAACAGTGCTTCGGCATA    |
| SGR1175                               | GCTCCCCGGAGTCCTTTT         | CAGCAGCGCCACACCTTC      |
| SGR1176                               | AGCCGGCCTTGGTATCAG         | ATCGGCCTGATCCGCTTC      |
| SGR1225                               | ACCGACAGGGAACACCTCAC       | GCGCTACCAGTCCAAAG       |
| SGR1270                               | GGGTGCTCTACCCTGTTCC        | CTGCTGACATTAGCTCGATACG  |
| SGR1279                               | CTACCTCAGCGTCGCGA          | CCGCTCAGGGTAGGCCG       |
| SGR1331                               | GCGCGCTCGATGTCTTG          | GTCCGCCCCGAGGTCCAGAT    |
| SGR1357                               | ATGGCGGTATGCGCCACATT       | CTCCGGCCGATTGTGAAAT     |
| SGR1360                               | CAGCCAGTCAAGCGATATGT       | ACCCCATGGCGTGTCTTT      |
| SGR1477                               | GCCGTACGGTTCGAGGAAC        | CGCTCCTGATTCCGTGA       |
| SGR1521                               | GGGCTCCCCCTTTTCTT          | GCGACAGAGACGGCCGAAAC    |
| SGR1599                               | GACCCGGCTCCTGGCTCTAC       | CTGCGCTCCTGGCGACT       |
| SGR1699_1                             | CTGTCTGTTGCCGGTTGG         | TTCGACGCATGAACATTTA     |
| SGR1699_2                             | GGCTCGCGGGGGTCAAGAAC       | ACCGAGAAGAAGTTTCGAAGAA  |
| SGR1714                               | GCCCGGAAACCAACTGCT         | GAGCGAGCAAGGGGCTTAC     |
| SGR1898                               | TACCGCCAAAAGGTGCATA        | GACCAGGGCGATGACTACAG    |
| SGR1940                               | CTGCTGAGCGCCGCGG           | TGAGCCGATCGCTCCCG       |

|           |                         |                       |
|-----------|-------------------------|-----------------------|
| SGR1941   | ACGTTTCCTCCTCCGACTG     | GTGTCCTGACACCGACCT    |
| SGR1983   | GGCATGTCTCGCAGCATC      | CGAGGTCGTA CTCTTGGTC  |
| SGR1984   | AGGAAGTCCGACTA ACTGTGGA | CGTACGCCCGAGGGGGTTA   |
| SGR1994   | GCCATGGCCCCACCAG        | AAACGGCCACCGGACGAT    |
| SGR2001   | CGGACGGTTGCGGGCCG       | TGGGAGGCACTGGGGCG     |
| SGR2020_1 | CCTTCGAGACGTTCCAC       | ACCCGTCACCATCTGCTATT  |
| SGR2020_2 | CATTCCGGCAAGAGCTGTA     | TCACAGCCGGCGGTGCC     |
| SGR2064   | AGGGTGGTCTGTCGGGTA      | ACCCCTGCCCGACCGTTG    |
| SGR2066_1 | GTGTTTCATCTGGTGCGGATA   | CAGAAACCGGGCCGAGAG    |
| SGR2066_2 | GGAGCCGCGGAGAAAAC       | GATGCGGACGACGGGTG     |
| SGR2066_3 | ACCTCCTCCACGTAAACACC    | GTCCAGGACTCTGGGGCCTA  |
| SGR2079_1 | GGCGCGTCACCATGTGTAAT    | GGTCCC GCGAGTGCACCA   |
| SGR2079_2 | CCTCGCGAGTTCCGCCAGT     | CCGGAACGCGTCTGTGATA   |
| SGR2105   | CCCGGTACGGGTGTTCTC      | GACTGCGTCTGCTCACCTCT  |
| SGR2115   | GGCGTCAAGGAGTGTCTTA     | GAAGCGTCGCCGAAGGAC    |
| SGR2148   | TATTGGCCGGTTGTGTTCC     | ATGGCCGGGGCCCTACG     |
| SGR2179   | AAGTCTGCAACCGACGTCTT    | GGGTGTCGTGCCGGTTCC    |
| SGR2185   | CTCCGGCCGACCTACTCT      | AGGCACTCGACACCATCG    |
| SGR2186   | GCTCAAAGTGCTCTCACCG     | TCGGGCGGAGTCCGAGG     |
| SGR2197   | CCCAGAAACACGCCATCC      | ATTGTCCGACCCGTGGTG    |
| SGR2214   | GCTGCTCAGCGACTTGG       | GAAAAGCGGCGCCTCAG     |
| SGR2217   | AGTCTGCACGAGCCCTTC      | AAGTTCGCTCCGCCTTT     |
| SGR2336   | GGTTCTTAACCACGGGAACG    | TGGGTTTCGATGATGCTGAT  |
| SGR2446_1 | CCACCGGAACGATCATCT      | CTCGGTGGCCGGGCAGTT    |
| SGR2446_2 | CTCCGCATAAGGAGGTGAAA    | GTACATGGACGGCAAGACCT  |
| SGR2446_3 | CCAAATACACATGGCTGAGG    | CGCTGTGGCCGTGCATAC    |
| SGR2453   | AGCTGGCTCTCCCTGGTTAG    | CGCAGTATTCAGCACTACGG  |
| SGR2479_1 | GAAGCGCTTTTCGGCCAAC     | CGTCCGCACGTCGAAGGT    |
| SGR2479_2 | GCGCGACCTCCGGTAATC      | GCTACGGCTTCGCGAGGAT   |
| SGR2484   | CGGGGAGAACCGGTGCGAG     | GCCTACACCTCGCACCTC    |
| SGR2493_1 | GGTTGCGGGCATCATCC       | ACTGGCGGCCCGATCCG     |
| SGR2493_2 | TCACCTCGTGGGGCGCTACT    | CCCACCGCCGGAGAGGTC    |
| SGR2519   | ATCGATCGTCCAGAAGAACC    | GTCTCACCCGGGGCCAAC    |
| SGR2623   | CTTCTGTTATTCCGGCGAAA    | GAGCTCACGGAGCGATACC   |
| SGR2648   | GGAGAAAACTCGATGGCTTCA   | TTTGCACAACCATGAGC     |
| SGR2701   | GCCGCAGGGGTCACACTT      | CGGGACCGGATCGAAAC     |
| SGR2710   | GGAGTTGGCCGACAATCG      | TTCCCTCTGGCGCTTCC     |
| SGR2770   | GAGTGCTAATCGCGGTCATA    | CGGGGTTTAACAGTCTGTGG  |
| SGR2783   | CGACAGGGCGTCCGGTAA      | CTCGGGCGTCCGGATGG     |
| SGR2820   | CCCTCCTTTCATGCCGTAG     | GCCGGGGTTTCCTGTATG    |
| SGR2836   | TAGGATTC CCGACTCGATTG   | CCTGGGGGCCGACGAGTA    |
| SGR2856   | CTTCTCTGCCATTGCTCCTC    | GTACTCGCGGTACGCGCTCA  |
| SGR3143   | TGTCCGGAACCCGTCACC      | GCCAGTCGGCCCCAACAT    |
| SGR3145   | CCGCCAGGTACAGTTTC       | ACCGAGTTGGCGTGAGGT    |
| SGR3149   | ACGGTCCGGTCCGGAGG       | ATGTCGGGCGGCCGCC      |
| SGR3168   | ATTCGTGCCACCGTGGCC      | TCGACTTCTCCCCGGCCG    |
| SGR3226_1 | GGGGCAATTCTGTATGGTTG    | GGCACTTATGCCCAAGAG    |
| SGR3226_2 | ATTCTCGTCCGATTGACCTG    | CTTGACCGGGACCGCACT    |
| SGR3307_1 | GATCGCCGAGATCACTTCTG    | GGACGACCACCCGAGAG     |
| SGR3307_2 | GTCCGGGACGGTGATTCT      | AGGCCAGGGGACGGATCG    |
| SGR3340_1 | GACAGACGGAGAGGCCCTTG    | GTGAAGAACCATGCGGTTG   |
| SGR3340_2 | CAAGATTGGGCCCGAAGG      | GCGCACTCCAGTCGGTTAC   |
| SGR3370   | GGGCTGCGTCTATGCGGTCA    | CCCGTCAGGGTTGTACGC    |
| SGR3379   | CCGACCGGCCCGGAGAG       | GAGTGCTCCTATACCTGACCA |
| SGR3399   | CGAGTTGTCTGTTTCTCCTC    | CGCGCCTCGACCAGGAT     |
| SGR3428   | TGATGCATCGCTTCTGTG      | GAGAAGGCAACAGCAAGCAC  |
| SGR3520   | ACAGTCGTACCCGGCGG       | AACTGCGCGGGCGGGCG     |
| SGR3532   | ACCTGAACGGCTGAACAAAT    | AGTCATCGAGCAGTGACGTG  |
| SGR3552   | ATGCCACCCCTTGAGGT       | CATGTCACTACAGCGTGTTC  |
| SGR3585   | GTCCCGTGACACCGATTATT    | CGAACGGTCACCTTCTC     |
| SGR3663   | GTTCCAGACCGCCGACCGG     | GGCTCACCCGGCGCGGC     |
| SGR3721   | ATGCGTTGCCGGCAGAT       | CGGAGCTCACGGACTGAC    |
| SGR3749   | ATCGAGTCGCGGAGCGCG      | CCGAGCTGGACGCCGAGC    |
| SGR3768   | GCAAATTCACCCGTTTCAGTAA  | GACCGTGACGCGATTGAT    |
| SGR3777   | GATACGTCCCCGCAGGTC      | GTGCAGGCGGGGAAGGTGTT  |

|           |                         |                         |
|-----------|-------------------------|-------------------------|
| SGR3840_1 | TACGTTACGCCGCGGG        | GGTCTCCGCGCCGAGC        |
| SGR3840_2 | CCCGGGTGAGTACAGACAAC    | TTCCTCGTACTTCCGGCTTC    |
| SGR3844   | CCGAATATCCACAGATCTCTTT  | GAGACTAGTTGAGACCCTGCAA  |
| SGR3901   | GGGCAATCTGGACGCGG       | CCGCAGCTCCGCCACGC       |
| SGR3902_1 | CGGAAACAGCGCCGATA       | ACCGGTCCGGGAGGTGA       |
| SGR3902_2 | GCCCTTAACGGTAGGGATA     | GTACCGATGCCTCCCAGGT     |
| SGR3905   | CTCCGCTCCCGGCTGA        | GCGTCCGCCGAGCTCAT       |
| SGR3926   | CACCTCATCTCTGCCGTCTT    | GGGGGTGGGGTCGGTTG       |
| SGR4011_1 | CCGTACGGGCGTAACTGT      | CCGGGTGATCAATTCTTCTG    |
| SGR4011_2 | CGTGATGGGATAGACCAC      | TTGTCAAGCCCCGAGATATG    |
| SGR4021   | ACACTCATCTAACCGAGTGATGG | CCGCACCCCGTCGATCC       |
| SGR4052_1 | CTCCATCGCTCGCACTCC      | GACTTGAGTCACAGAGTCCATTT |
| SGR4052_2 | GAGACCGGCGACGATTCC      | GGAGTGCAGCGATGGAG       |
| SGR4070   | GGTCCGACCTCCCCATC       | GGCAGTTTCGGAGCTTTCT     |
| SGR4071   | TACTGGTGGGCCAGTTCAT     | GAAGACAGCCGGGATCTTCT    |
| SGR4086   | TCGGATGGGTGATTGGAG      | AACACCTCCCCACCAAG       |
| SGR4191   | CACGATGATCGGGTTGC       | CTCGGCCCTGCGCCGGT       |
| SGR4256   | ACGAGTTGACGCGTCGG       | AGATGGCCGTTCACTCGAC     |
| SGR4279   | GCCCTACGTTTTACGAACC     | GAGTCGGTCGAGGTGGTG      |
| SGR4302   | GTCGCGCTCACCACGAAG      | GTCGGCTCGTCTTCCCGTA     |
| SGR4304   | CTTTTCTACAGAAGTGGCCGAGA | ATTCGAATGGCAACTGTACTGC  |
| SGR4396_1 | ACCATCCCAGTACTGGTGT     | AGCCGCGAAGCGGTGATG      |
| SGR4396_2 | CCCATTCCGTTCGATGC       | GCTTGTGCGGCGGATGAT      |
| SGR4437   | CGGATTCCGTGCCTGCTG      | GCGTCAACTCTGTGACTTTCA   |
| SGR4556   | GGTTCACACCCGTCCCAGAC    | GGCTTCTGAATAGCCGTCAA    |
| SGR4619   | CCCGTCTCTGATTGGTCACT    | GCATACCGTCCGCATAACC     |
| SGR4671   | GAGCGGGTAGCGTGAATC      | AACCCGGTTGATGGAATTTA    |
| SGR4793   | CCACGCCAGACCTGGTT       | GGCCCGTCACGGTCAGC       |
| SGR4807   | GAACGGTTCAGCCAACTAA     | GCTCAGCAGTCCGATCTCTT    |
| SGR4809   | CTCGCGGGAGCCCTATTAAG    | GGGAGTCGCCCCATCTT       |
| SGR4868   | GTATCCGGGCACGTTGTG      | GCTCGGCGGGTGTGTCCT      |
| SGR4888   | CCATGGCCGCGTCTGGTC      | GGAGGCGAGTCAGGGACA      |
| SGR4898   | GTTGGCCGTATGTTCTGTTT    | CAACTCCGCGATGGACAAG     |
| SGR4899   | CCCATCCCTTCTTCTATCC     | GCGCTCCAAAACGTGGTC      |
| SGR4921   | CCGGAAGCGTGCACCAC       | GCGGAGGTGGGGCCGAC       |
| SGR4958   | GCTCATGCGCATAACCGAAC    | TACCGGCGCGTGGGTGAC      |
| SGR4961   | CTCCTGTGGTGTGTTGCTGT    | GCCTCACCCCTGAAACG       |
| SGR5011   | GGGTCCGCTACGACTACAG     | CACTGTTTACCCGTCATCG     |
| SGR5013   | CTTTGGCTGACCGCACGTC     | TCGGGGTTCGGCCATATC      |
| SGR5028   | GGATTCCGTCGTCACAGG      | TGGGCATCTAGACCGAGAAA    |
| SGR5049_1 | ATTCTCGCGCGGCATTC       | TGCGCCGACGACCGGACGT     |
| SGR5049_2 | AGCTGTACGGCGTCGGGTA     | ATGGACCGCACCCGGCTTAC    |
| SGR5049_3 | CAGCCTGGACACATGGATAC    | GAGCGGGCGAGACCTTT       |
| SGR5072   | GTGGTCCGCGCCGAGCC       | GAATTGCCGACCCGGTC       |
| SGR5085   | CGTTTTCTTGACGGTCTT      | GCGGGGCGAGATCCAGTC      |
| SGR5226   | GAACAAGCCATTACGTGACC    | GTATGCGCATGCGGTGTT      |
| SGR5399   | CCGGTCGCCAGCAGGTCA      | AAACGAGACAAAAGTTGGTTGC  |
| SGR5523_1 | CGGCTGACCCCCACCAC       | CTGTTGAGTGGCTCATGGAA    |
| SGR5523_2 | CAACAGCCACATCCACCC      | TGTCGCCGTTTCGGTGCG      |
| SGR5525   | CTCCACAACCACCGCAAC      | CATCGAGTAAATGTTGAGTGAG  |
| SGR5654   | AATCCCCGATTCCGCAAG      | GTCTCGTACTCCGGTGGTG     |
| SGR5766_1 | GGGTCTGTTCCGGACATT      | GAAGGCGTGTTCGACTTTC     |
| SGR5766_2 | AGCACGAATTCCGAAAAGG     | AGGAAGCTCAGCCGTGTCT     |
| SGR5809   | GAGCGTGGGCCCCGACAAG     | CACGGGCGAACCCTGTT       |
| SGR5819   | CAACTCCGTTCACTTTAGGC    | GAAGGGGCTGAGGGGTTT      |
| SGR5856_1 | GAAGTGTCAACACCCGTCA     | CCGTACAGAGGTCTGATCG     |
| SGR5856_2 | GGTTGATGTCGTCGTCGTG     | CAAGGGTGAAGATCGGACAC    |
| SGR5857   | CAGCCGGTCCGCGTGTTA      | CAAGAAGGGTGAGCGGATCG    |
| SGR5859   | GCGTTTCCCTCCAGGTATG     | CGAACATGTGGATCACTGC     |
| SGR5909   | CGACAGCCATCTCCCCTAT     | CCACCGGCGCACTCTCT       |
| SGR5914   | CTCGCGCTTCCATGAGATAC    | GATATCCGGGCCCTGGTCGAT   |
| SGR5915   | GAGGCGGAGCGAATTTCT      | TACCGGACGCGAGTCAAC      |
| SGR5922   | CCGGGCATCGTACTCC        | AAGGTGTTGACCCGAGGAA     |
| SGR5933   | GGCGGGTCCGGACACAC       | GAGAGCAGCGACCCGGTG      |
| SGR6006   | ACACGGCGTTCGATGCAC      | GTCGTTGGCCACCTGTGC      |

|           |                           |                       |
|-----------|---------------------------|-----------------------|
| SGR6029   | AGCGGGCTAGATAAACTCG       | GTCCCACGCTCCTGCTGT    |
| SGR6043   | CGGAGAGGGGCTCCAACC        | ACACCGCCCCGGCCCGGA    |
| SGR6054   | ATCCACAGGTGAGCGGAGA       | GATATGTCGCGAAAATCCTG  |
| SGR6126_1 | GTCGATTCCGACACGCATC       | ACCCACCGTGCCTAC       |
| SGR6126_2 | TGCCCCCGCCGCGCAC          | GGGACGGCTGAAAATCATC   |
| SGR6132   | TCGACTTCCCGGTGCAC         | AACCGAACACGCCCTTT     |
| SGR6153   | CGACTCCCTCTCAAATCACC      | ATCAACGCTCTGCCTCGTT   |
| SGR6192   | CCCCCGGGGTCGTACCT         | GTGGGCTGTGTGGGTGTG    |
| SGR6286   | TCCCTTCCCGCCCTGGT         | GTCCCGAATTACCGCTTC    |
| SGR6324   | CCGGACCGGGACGAACAG        | GTCGCCGGGATCCGAATA    |
| SGR6363   | GCCGTACCAGTTGGTGTCT       | GGATCCACTCGGATGTCAG   |
| SGR6383_1 | GTCCGCACGGCACCTTC         | GCCCCCGCACGGCATC      |
| SGR6383_2 | GGTTTGAACCTAATTTTACCTGAGC | CCGCGGATCACGCCGGC     |
| SGR6548   | TCCCCGGGAGGATCGTGAAC      | GTGGGAGGATCGGCATGAG   |
| SGR6629   | CTCCTCACGCCACACC          | TCCGGAAGGGGGCCGG      |
| SGR6710_1 | AGCCTAAGCTGGCCAACAA       | AGGGATGGGCCGGCAAGTA   |
| SGR6710_2 | ACTGCTGCTCGAAGAAGTGG      | GTCTTCTGCGACACAC      |
| SGR6725   | GGAATCAGGGGCACGGTA        | GGCGTCGGCATGGTTGC     |
| SGR6776_1 | CGGAGGACAGGGATCAAC        | CCTGTGCCCGGTCTG       |
| SGR6776_2 | TGTTACACGTTTGTCCACT       | GGACCGGGCTGCCGCAC     |
| SGR6776_3 | AGATCGGTGGTGGTGGT         | CGTGGGCGCTGTGTTC      |
| SGR6809   | CTGCTGCGTACACCTGTCAT      | CCGGACCTCCGGACAGC     |
| SGR6814   | ACTTCGCCCGGGCTGAT         | GGCCGGAACGTGACGAAC    |
| SGR6854   | CTGACCGAAGGCGAGAGC        | CGAATCCCGGAGGAACACTAC |
| SGR6856   | TAGCCGGCTCCCGGTGC         | TACCCGGGGCTTCCGCGC    |

**down-regulated by AdpA**

|           |                       |                       |
|-----------|-----------------------|-----------------------|
| SGR269    | GCACCGTGGCGACACGAG    | GAGGGGCGGGCCGAAGAT    |
| SGR291    | TTGCCCCGTGCGACGGG     | GAGCGGGCGGGCACTTT     |
| SGR955    | CGCAACCGATGGCTTGTT    | CTTACCTGGTCCCCGCTCCT  |
| SGR966    | ACGGCAAGTAGGGCGATA    | GCTGGAGATCTTCCGTCATT  |
| SGR1311   | GTGTTGCGGAGGGCGTTAG   | CGTGCAGTGGGGAGTGG     |
| SGR1459   | CGTTTCGGCAAGGGGGCTCT  | GGCGCCCGTGTGTGTCAG    |
| SGR1676_1 | CAAGTTGCCCGGCGTGTG    | ACTCGAACC GGCGGAGTC   |
| SGR1676_2 | ACTCCGCCGTTTCGAGTG    | CACCGCGGAGAACTTCG     |
| SGR1869   | TCGCCCCGACGAGACCTAT   | TTGAACGAGTGGCATGTGGT  |
| SGR1903   | ACTTTCGTCGACATCCATC   | GCGCTTCTTCGTTTCATGC   |
| SGR1979   | CAGACTGCTCCCGTGTCC    | CTCGCGGGTGGGAGAGGT    |
| SGR2045   | ACAGTGTGGCCGGAATC     | ACCGTCCCCGGTCCCTTC    |
| SGR2129   | CGGACCGGGTCCGCCCC     | CAGCCGGTGCAGGGCGGAAG  |
| SGR2195   | CAGATGGGGCAGGATCAC    | CCGATCACCGAGGTGGAG    |
| SGR2322   | TGGTCTTCCGATCGTTAAT   | AGCCCAACTCGCCATATC    |
| SGR2367   | CGGCGGCCAGGCTATCAG    | GTCCCCGAGGGCGGAAAC    |
| SGR2702_1 | GCGCCGGAAACCTCCAT     | GGGGCGGAAAGGGCGTGT    |
| SGR2702_2 | CGCACCGGTGCCGGAGA     | GAAGGAGCCCGCGGTGG     |
| SGR2730   | TGGGGTGCCCGCGCGGA     | GCAGGCGGGGAGGGGAAAT   |
| SGR2910   | GTTCTGACGGCCAGTCTGC   | CGGTCTGAGCAGAGCACA    |
| SGR2964   | ATCCATAGCGGACCGGATAC  | CGGTCTGAGAGACTGGT     |
| SGR3001   | TCCAGAACCTGCAACAAGTC  | GAAGTGATCTTCCCTTACCG  |
| SGR3022   | GGGGAACGCCGAGGAC      | CACCGAAGTTGTCCACAGG   |
| SGR3072   | GCAGGGCCATCGCACGAC    | CATGGGGACCACGCCTTC    |
| SGR3165   | TGAATCTGCTTGGGTTGG    | GGAGTCGACCGGAGCGGT    |
| SGR3404   | GCTATTGCGCCAGGGCTTC   | GGGCGGGCATGTCCAAG     |
| SGR3513   | CCGCGATAGACATGACCTTG  | ATCTGCACCTTCCGTCAC    |
| SGR3524   | CCCTGTTGCCCGCTG       | GCTCAGCACGCTCACGGA    |
| SGR3620_1 | CTCCAGTGTCCGGCTAACTT  | ACCGTTTACGTACCCAGCAT  |
| SGR3620_2 | TGGATCCATTCCAGCCACT   | CGTGTACATGTGGATGCATTG |
| SGR3646   | CGGGGCCCTTTGTGTGG     | CCGATTACGGGAGGAACC    |
| SGR3675   | CCTCTGAGCTCTGATTTCAA  | ACACCCAACCGGACGAT     |
| SGR3701   | GGGAACGTGGGTAAAGCTG   | TTTTGTCCACCGTCTCTG    |
| SGR3782   | GCACAGCGCGCGTGAAC     | GTACCCGGCCCGGAACA     |
| SGR3880   | TGATCCGCCCGCCCTGA     | GGGGTGGTGTGCGTCTG     |
| SGR3897   | CCCTTGCGGAATTCGGCG    | CCCCGCCCTGTTCGTTAAT   |
| SGR3928   | ATTCGGTCAGGCTGATGCTA  | CCTGCCGGGATATCGTAAC   |
| SGR3960   | GCGGAACCTCATGTGGGTTAT | CATACGGCTTTCACACAGC   |



|           |                            |                           |
|-----------|----------------------------|---------------------------|
| SGR3965   | GACGCGGCACAGGTCTAC         | CTCCCCGTCTCGCATCAC        |
| SGR4153   | GGCCCCGACGGACTGGCTAT       | CGGCGACCGAGGTCTTGC        |
| SGR4276   | ATTCACTTTCGCGATCATGC       | GCCCGAGAGCCCGCAAG         |
| SGR4380   | CCGGGCACAACCTCTGA          | CCCATGGCCGCCCGTCGG        |
| SGR4383   | GCGTCGTCGCAGGAGACC         | GTGTATCTGGCGCTGCAC        |
| SGR4443_1 | GTGAGCCCCTTACAAGGAT        | AAGGGCCAAGGTCCAGCTC       |
| SGR4443_2 | CTTCTTACAATGCGACGAG        | ATCCTTGTGAAGGGCTCAC       |
| SGR4455   | CGAGACGCCAGGACAGAT         | CAAGGTGAAATAAAGTGAAGTGA   |
| SGR4456   | CTTGCTGGATCCGTCGTG         | CTGTTGGGCTTCGGCTCT        |
| SGR4462   | CGTACGGGGCGGGTCTCT         | GCATCACTGGCAGGACCTGTT     |
| SGR4473   | CTGTGATCCATGTCTCAAGTCC     | CTCAGGAGCCGGCGGGAAC       |
| SGR4482   | ACCGTTAAGTAACTCAATTTTAGTCC | ATAGTCGGGGACCGGAAG        |
| SGR4489   | GGTCGGCTTGCCCGGAAT         | GGCTGTTGCCAAGCTGAT        |
| SGR4581_1 | CACCGACCCGCCATGCTC         | GGCGCACGGGAATCACTT        |
| SGR4581_2 | CCGTTGCCATGGCCGAGT         | AAAGACGGCAGTCATTACCGGCTAC |
| SGR4623   | CATCGGGACGTTTCGATCT        | AGTTCATGGCTGGGATGCTA      |
| SGR4652   | GAAAGTTCTCGCCAACGAAG       | GCCTTGGCGGACTGGTTC        |
| SGR4698   | TGGCGTCTGCCGTTTAC          | ACATCGACGCCTGGAAGTC       |
| SGR4724   | CCGCGTACGGGATGTCC          | GCCGATGACCGGTTCGGC        |
| SGR4803   | GTCGGTATGGCGCCGGTAT        | GTTCGGGGACGGTCCGAAG       |
| SGR4919   | CGCGATCTGCCGTCGTC          | CCGAGGTGGAGGCCATCG        |
| SGR4930   | CGACGATCTCGCCGATCA         | GCCCCGCACCCCTGTAAAT       |
| SGR4995_1 | CTTCAGCCGGGAGAACAG         | GTCCACGTCGAGGTGATGA       |
| SGR4995_2 | ATCGGTCAACTCGGAGGAC        | CGCCCGTCGGTTCCTAAC        |
| SGR5104   | AGCGGCCTCGCGTCCGTA         | GGCGGTCCCGGTACATTA        |
| SGR5316   | GCCACCGCCCCGGTTAACTT       | GAGGGACGGGGTTGTGTAG       |
| SGR5429   | CCCCTACGGGCCCTGATA         | GACGTTCTTCCGGCGGC         |
| SGR5447   | CCCCTTTTCCCGCTCAAC         | ATCGCGACCACGACGAAG        |
| SGR5467   | CTCGTGCCCCGCCATGAGT        | CCTGACCCACGCTCACCT        |
| SGR5469   | AGCACACTCACGCGAGCG         | AACGACCGGGTCGGGCC         |
| SGR5483   | TACATGATGGGGCGCTTC         | TCCCCGGGCGCCGATCGT        |
| SGR5504   | ACCGGCCCGGACCCGGACGT       | GGTCTGCACAGCCCGCA         |
| SGR5533_1 | GAGCGCGCCTGCTAGGT          | GGAACACCAGTTGTGCCGAAT     |
| SGR5533_2 | GGACAGGCCGGAGAACACTA       | GGTTCATCGTGCCCGTCTTT      |
| SGR5674   | CCTCCCCCGGTGGTGTC          | GCCCCATCGCCACCACT         |
| SGR5698   | CAGTCCAGTACATCGCTCA        | CTAGGCAACGCCTGGGAAC       |
| SGR5721   | GGGCCTCGTGCGCTGTC          | CGTGAAGTGACTGGGGTAT       |
| SGR5890   | GGAGCGGTGCGGGTCTTTT        | GCTCCGTGCGAGGTCACT        |
| SGR5904   | GATCGGAGCCTCCACTTGT        | ACGATAAGGCCAGGCCAC        |
| SGR5977   | GCGCATTCGACACATACAAC       | ATCCAGCACTGTCCGCTATG      |
| SGR6046   | CTCACGGGACGGATCGTTA        | TACGCAGCGTTACTTGGATG      |
| SGR6069_1 | AGGTCAGCCGGGTGATGTG        | AGGTCCTGGAGCGCATCG        |
| SGR6069_2 | CCGGAGCTCTGGAGCAG          | GGTCGACGCGCAACACT         |
| SGR6089_1 | ACGGGTGCGGGACTATAAC        | CGCCAGGTTTTCTGTGACC       |
| SGR6089_2 | GACGACAGATAGAGCGGCTCAC     | GGCGGGTCGTATCGGTA         |
| SGR6240   | GCCGGGCGGCCATCTAT          | GCTGCTGGTAGGGATTTCG       |
| SGR6295   | TCCCGCTGCGTCCGGAGT         | CGTGCCCGGGCTTCTC          |
| SGR6342   | AGCCGTCCAGGCAGTGAC         | TCAATCATCGTCTCCCTTG       |
| SGR6353   | GCGGACCTCGATCCGGC          | TCAGCACTGTATGGGCTTT       |
| SGR6836   | AGCCCCGCCCCGGCTGA          | GAGGTTGCCCGGCCAGT         |
| SGR6952   | CGGGCACCGACCGGATAC         | CATGGGTGGCCGTCCGAGT       |

#### Competitive EMSA (200-250 bp)

##### up-regulated by AdpA

|           |                      |                      |
|-----------|----------------------|----------------------|
| SGR1357   | CTGCGCATGAGCTGATCTT  | GGATCGTCATCTGCTGTCGT |
| SGR1599   | TCGGGAAGAAGCACTTTGAT | ATGATGCTCGTCGGGTTG   |
| SGR1940   | GCTGGCAGTGCTGCTGAG   | CCAGGATGATTGGCCTGTT  |
| SGR1983   | CCTCGTCCGTATGGTGGAC  | CGCGTCCGGGAGGGTGTG   |
| SGR1984   | CTCCACCGCTCTGACCTG   | GGATCGGATTTTCGAGGTG  |
| SGR2020_2 | GGCAATAGCAGATGGTGAC  | GCTCTCGGTCCGGTTTCATT |
| SGR2197   | CCGTAGGCATGCTCCATC   | GTCACGGCACGAGGAAAG   |
| SGR2493_1 | GGTGTGGTGACTTGTGGTCA | GGACGGCTGGGAGCACTG   |
| SGR2519   | CGACGGCACCCGCAACAG   | CGGGGAACGTCATGAAGAC  |
| SGR2623   | GGGTCTCCTATACCACTTGA | TACGGTCACTTCGGAGGTCT |

|           |                       |                         |
|-----------|-----------------------|-------------------------|
| SGR3340_2 | CGCATACGCATAGTCCGTTC  | CAGTTCATCCGGATCGGTAG    |
| SGR3370   | GTTGTCGTATCCGACGATGA  | CCACTGTGATGTCGAGAACC    |
| SGR3379   | ACGGACGCGTAGGGCTTC    | CGGCGTGAGTGCTCCTATAC    |
| SGR3428   | AGGAACATGAATCAGCAGGAA | CCCTCAACGAGGTCAAGAAC    |
| SGR3552   | TCTTCGTGAGCGTGAGCA    | GATTCGGCGCTGACTTGT      |
| SGR3585   | CCAGTGGTGACCTGAATGC   | TTTAGCGAACTAAGCGTGGTC   |
| SGR3663   | CGCGGTCTCTCGCAGAGAT   | ATCGCCCTCGTCGCCGTCT     |
| SGR3902_2 | ACAACAATCCCCGCCATCC   | CCCTCGACACACAGACAGC     |
| SGR3905   | GTAACCCGTCGGGGTGT     | ACGGCGTCCGCCGAGCTCAT    |
| SGR4021   | GCTCGTCGTACCGCGGCTTCT | CACCGCCCCCGCACCCCGTCGAT |
| SGR4556   | GGGAATCGCCTCGGCAAG    | CCGTTGCGGAGGACCTGT      |
| SGR4793   | AACTTATCGGGGCAACACAC  | AGGGCTCGTACACGAAGATG    |
| SGR4899   | TGCGGATGTCTTCTTCTGTG  | CTGACGAGTCACTCCAGCTC    |
| SGR5011   | GCTGCAGCACCAGACTCC    | ACGGTGATTGACGAAATGGA    |
| SGR5049_1 | AACGACGCAATGTGCTCTG   | GGGGGTGCCGCCGCTTC       |
| SGR5049_2 | GCCAGAAGTGAAAGGTCTCG  | GCAAAGAAATTCGGGTGAC     |
| SGR5085   | CGCTACACGAACGGCTTT    | ACAGCAGGCGTCCCTCCTC     |
| SGR5399   | GTCTTGGGAGCCCAGAATC   | GCATCTCGGGCATCTGTC      |
| SGR5533_1 | GAGAGACGCCTCGACAACC   | GCCGTGCCGTAGTGTCT       |
| SGR5909   | GTCGCGGCGAGCTCATGC    | CCGACGCGTAACCGAGCAC     |
| SGR5915   | GCAAGCCACAGCAAGTACC   | GTAACGCCCTCGGGTGAG      |
| SGR5922   | GTGCGGTGCTGCGCTTGG    | AGCCGTACGCCACAGTCG      |
| SGR5933   | GCTCGACTCGGCAGTGCT    | ACATATGCCCGAGCGAAG      |
| SGR6006   | CGGCGCACTGTCGCACAC    | CGAGCCCTGGATCGGGATCTG   |
| SGR6153   | AAACACCGGCGAGTTTCG    | GTGACGGGCGAGTCGTATC     |

**down-regulated by AdpA**

|           |                       |                       |
|-----------|-----------------------|-----------------------|
| SGR1459   | GTACGCCTCCGCCAGCTCGT  | ACGGGCGCACAGGGACAG    |
| SGR1676_2 | ATCCGTGTGATGCCTTGACT  | GAAGCACAAACACGCATCAG  |
| SGR1979   | ACGACCGCATCCTGAGAC    | ATCATCCCGCTTGCTCGT    |
| SGR2702_2 | CTCCCGTGCTCCGCCCTTC   | AGGTAGTTGCCGAGGTGGAA  |
| SGR2730   | ATGCCCTCATGGGGTGTG    | ATCCCGCAAGGGCGTGT     |
| SGR3675   | ACCGCATCTGTCTCGATTGT  | GTCGTGATGCGTAGTGCAAC  |
| SGR3960   | CGTGAGCAAGGGAACAGAA   | CACTGCTTCGTACGTATGC   |
| SGR3965   | CTCAGAAGGGGCGACAGA    | GGGCAGGCTCGGGGAGTC    |
| SGR4153   | GAATCACCCGATTACCATT   | CCAGGAGGGCGGATTCGT    |
| SGR4276   | GTGAGTGCGGTCTCATGCT   | CGATGGAAACAACGACTGG   |
| SGR4443_1 | CTCATGCCATCGAGTATCCA  | GTTGCGGCCGTATGAAGG    |
| SGR4443_2 | GTGACGGTCCCTCCCCGTA   | CACGTGGGCGGCGAAGTGTAG |
| SGR4455   | GTTTCGTATGTTTCGCGTTCA | TGATCAGCGAACCTCAGTTG  |
| SGR5467   | AAATGATGACACCGGTCCAG  | CCGAGGACCTGTGGAAGG    |
| SGR5533_2 | AGGGTCAATGCGCGAAGG    | AGGTCCCGTGGATCTCTTG   |
| SGR5698   | GGAGACGTCTGCCACCAG    | AGTCTGAACGTGGTTCGAC   |
| SGR5904   | GAACGATGGGGACCGTC     | GCTCATGCCACACGATAAG   |
| SGR5977   | CAGGCTCGGTCTCGCTTC    | CTTCGCGACAACCGGAAC    |
| SGR6089_2 | GGTTGACCAAGGTGAGATTCC | GGGTCTCTGCTCTTTC      |
| SGR6295   | GTTCCCGTTCAACGAATTG   | CAGATGGGAGGTGATCAGG   |
| SGR6342   | GGACGCGGTGACGGTGTG    | GGAACAGCTGCCGCCTTG    |
| SGR6836   | CTTCGCCATGTGGCTGGT    | AGACCGCGCCGAGGTTG     |

**RT-PCR**

|       |                         |                         |
|-------|-------------------------|-------------------------|
| trn21 | GGTAGAACATGAGCTTCCCAAG  | CGGGTGACGAGAATCGAAC     |
| trn50 | GGCGTAGCTCAATGGTAGAG    | GGCGACGGGAATCGAACC      |
| trn27 | GGGCCTTAGCTCAGTTGGTA    | GAGATTCGAACTCCTGACATCTG |
| trn40 | CAGTCTGGTAGCGCACCTC     | GGACCTGTGGGGATTGAAAC    |
| trn57 | GGGTGCGTAGCTCAGGGGTA    | GTTTCGAACCGCCGACAT      |
| trn42 | ACGTAGACACGGCGAGCTTA    | CGGAGCCGGACTCGAACC      |
| trn58 | CCAGTACTCCAAGTGTAGAGAGG | GATTCGAACCCACACTGTCC    |
| trn26 | TCAGTTGGTTAGAGCGCATCC   | GGGTAACAGGATTTGAACC     |
| trn56 | GCTCAGCCGGTTAGAGCAG     | GGCGGGTGGGACTCGAAC      |
| trn20 | GGGTGTAGCGCAGCTTGG      | GGATTTGAACCCACGACCT     |
| trn51 | GTGTGGCGCAGCTTGGTA      | CGGATTCGAACCGACGAC      |
| trn14 | GCTCAATTGGTAGAGCACTGG   | GGCCGGAGGGACTTGAAC      |
| trn22 | AGGAGCTCGCCTCGAAAG      | GTAGCGGTGGGATTTGAACC    |

|       |                         |                        |
|-------|-------------------------|------------------------|
| trn24 | GTCTATGGCGCCGCACTG      | GAGGGATTGAACCCTCGAT    |
| trn29 | GGATTGCGCTAGTGGCCTA     | TGGCGGAGGATACGAGATT    |
| trn19 | CCTTAGCTCAGTTGGCCAGAG   | GGGATTGGAACCCGAGACCT   |
| trn38 | CTCAGTCCGGCCCAGAGC      | GGATTGGAACCGACGACCT    |
| trn54 | TGTAGCTCAATTGGCAGAGC    | GACTGGACTCGAACCAGTAACC |
| trn41 | CATGGTGTAAATCAGGCAGCA   | CATCAGGATTTGAACCTGAACA |
| trn17 | GTGCCCGAGTGGCCAAAG      | CGAACCTGGGTAGGCTGA     |
| trn36 | GCCGTTAGCTCAATTGGTCA    | GACTCGAACCCACAACCAA    |
| trn23 | CTCGTAGCTTAACGGATAGAGCA | GTGCACTCGGCAGGATTC     |
| trn48 | CTCAGCTGGCAGAGCACCT     | GGTGAGTAACGGGACTTGA    |

---

\*Numbers are added after gene ID, when AdpA binds to two (or three) sites in a "putative regulatory region"; the farthest AdpA-binding site to its target gene is named 1.

**Supplemental Table S2.** AdpA-binding motifs with different affinities.

| AdpA-binding sequence | affinities in vivo <sup>a</sup> | affinities in vitro |
|-----------------------|---------------------------------|---------------------|
| TGTCCGAAAA            | 343                             | 1                   |
|                       | 1094                            | 4                   |
|                       | 1647                            | 5                   |
| TGGCCGGATT            | 903                             | 2                   |
|                       | 3957                            | 4                   |
|                       | 953                             | 4                   |
| TGGCCGGAAC            | 185                             | 1                   |
|                       | 790                             | 2                   |
|                       | 293                             | 4                   |
| TGGCCGAAA             | 245                             | 1                   |
|                       | 1181                            | 2                   |
|                       | 504                             | 4                   |
| TGGCCGAAAA            | 2724                            | 1                   |
|                       | 1988                            | 3                   |
| TGGCCCGAAT            | 651                             | 0                   |
|                       | 705                             | 3                   |
| CGGCTGGTTT            | 342                             | 0                   |
|                       | 191                             | 4                   |

<sup>a</sup>mean signal of ChIP-seq and ChAP-seq

**Supplemental Table S3.** List of genes that are probably activated directly by AdpA in both liquid and solid culture.

| transcriptional unit | ID      | description                                               | memo <sup>a</sup> | identified previousl |
|----------------------|---------|-----------------------------------------------------------|-------------------|----------------------|
| SGR95t               | SGR95t  | putative regulatory protein                               |                   |                      |
| SGR180-SGR179        | SGR180  | hypothetical protein                                      |                   |                      |
|                      | SGR179  | hypothetical protein                                      |                   |                      |
| SGR264-SGR263        | SGR264  | putative cytochrome P450                                  |                   |                      |
|                      | SGR263  | putative ferredoxin                                       |                   |                      |
| SGR299               | SGR299  | putative sporulation-control protein                      |                   | 2                    |
| SGR381               | SGR381  | hypothetical protein                                      |                   |                      |
| SGR598-SGR597        | SGR598  | hypothetical protein                                      |                   | 2                    |
|                      | SGR597  | hypothetical protein                                      |                   |                      |
| SGR681-SGR680        | SGR681  | hypothetical protein                                      |                   |                      |
|                      | SGR680  | putative Hsp90-family heat shock protein                  |                   |                      |
| SGR692-SGR691        | SGR692  | putative LacI-family transcriptional regulator            |                   |                      |
|                      | SGR691  | hypothetical protein                                      |                   |                      |
| SGR695-SGR698        | SGR695  | putative glutamylcysteine synthetase                      |                   |                      |
|                      | SGR696  | conserved hypothetical protein                            |                   |                      |
|                      | SGR697  | conserved hypothetical protein                            |                   |                      |
|                      | SGR698  | conserved hypothetical protein                            |                   |                      |
| SGR731               | SGR731  | hypothetical protein                                      |                   |                      |
| SGR745               | SGR745  | putative M23-family secreted peptidase                    | p                 |                      |
| SGR919-SGR916        | SGR919  | hypothetical protein                                      |                   | 2                    |
|                      | SGR918  | putative subtilisin-like serine protease                  | p                 |                      |
|                      | SGR917  | hypothetical protein                                      |                   |                      |
|                      | SGR916  | hypothetical protein                                      |                   |                      |
| SGR920               | SGR920  | hypothetical protein                                      |                   |                      |
| SGR1063-SGR1059      | SGR1063 | <i>rarA</i>                                               | m, s              |                      |
|                      | SGR1062 | <i>rarB</i>                                               | m, s              |                      |
|                      | SGR1061 | <i>rarC</i>                                               | m, s              |                      |
|                      | SGR1060 | <i>rarD</i>                                               | m, s              |                      |
|                      | SGR1059 | <i>rarE</i>                                               | m, s              |                      |
| SGR1175              | SGR1175 | putative phosphatidylserine decarboxylase                 |                   |                      |
| SGR1176              | SGR1176 | putative phosphatidylserine synthase                      |                   |                      |
| SGR1331-SGR1332      | SGR1331 | putative acetyltransferase                                |                   |                      |
|                      | SGR1332 | hypothetical protein                                      |                   |                      |
| SGR1357              | SGR1357 | conserved hypothetical protein                            |                   |                      |
| SGR1360              | SGR1360 | putative transmembrane protein                            |                   |                      |
| SGR1714              | SGR1714 | putative TerD-family protein                              |                   |                      |
| SGR1898              | SGR1898 | putative signal recognition particle-docking protein FtsY |                   |                      |
| SGR1983              | SGR1983 | putative 3-isopropylmalate dehydrogenase                  |                   |                      |
| SGR2001-SGR1997      | SGR2001 | putative integral membrane phosphodiesterase              |                   |                      |
|                      | SGR2000 | putative acetolactate synthase subunit large              |                   |                      |
|                      | SGR1999 | putative acetolactate synthase subunit small              |                   |                      |
|                      | SGR1998 | putative ketol-acid reductoisomerase                      |                   |                      |
|                      | SGR1997 | putative D-3-phosphoglycerate dehydrogenase               |                   |                      |
| SGR2066-SGR2069      | SGR2066 | putative phage tail sheath protein                        |                   | 2                    |
|                      | SGR2067 | putative phage tail protein                               |                   |                      |
|                      | SGR2068 | hypothetical protein                                      |                   |                      |
|                      | SGR2069 | hypothetical protein                                      |                   |                      |
| SGR2079              | SGR2079 | terpene cyclase ( <i>gcoA</i> )                           | s                 | 2                    |
| SGR2095              | SGR2095 | <i>sgmA</i>                                               | p                 | 1                    |
| SGR2105              | SGR2105 | hypothetical protein                                      |                   |                      |
| SGR2148              | SGR2148 | conserved hypothetical protein                            |                   | 2                    |
| SGR2217-SGR2214      | SGR2217 | putative sensor-like histidine kinase                     |                   |                      |
|                      | SGR2216 | conserved hypothetical protein                            |                   |                      |
|                      | SGR2215 | conserved hypothetical protein                            |                   |                      |
|                      | SGR2214 | putative ATP/GTP-binding protein                          |                   |                      |
| SGR2393              | SGR2393 | <i>amfR</i>                                               | m                 | 1                    |
| SGR2446-SGR2447      | SGR2446 | tyrosinase co-factor protein ( <i>melC1-2</i> )           | s                 | 2, 3                 |
|                      | SGR2447 | tyrosinase ( <i>melC2-2</i> )                             | s                 |                      |

|                 |         |                                                                |      |      |
|-----------------|---------|----------------------------------------------------------------|------|------|
| SGR2479         | SGR2479 | putative WhiB-family transcriptional regulator ( <i>wblI</i> ) |      |      |
| SGR2710-SGR2708 | SGR2710 | hypothetical protein                                           |      |      |
|                 | SGR2709 | hypothetical protein                                           |      | s    |
|                 | SGR2708 | hypothetical protein                                           |      |      |
| SGR2770-SGR2769 | SGR2770 | putative GroES                                                 |      |      |
|                 | SGR2769 | putative GroEL1                                                |      |      |
| SGR2820-SGR2818 | SGR2820 | 30S ribosomal protein S8                                       |      |      |
|                 | SGR2819 | 50S ribosomal protein L6                                       |      |      |
|                 | SGR2818 | 50S ribosomal protein L18                                      |      |      |
| SGR2836         | SGR2836 | hypothetical protein                                           |      |      |
| SGR3143-SGR3140 | SGR3143 | hypothetical protein                                           |      |      |
|                 | SGR3142 | hypothetical protein                                           |      |      |
|                 | SGR3141 | hypothetical protein                                           |      |      |
|                 | SGR3140 | hypothetical protein                                           |      |      |
| SGR3226         | SGR3226 | putative cold shock protein                                    |      | 2    |
| SGR3307-SGR3306 | SGR3307 | anti-sigma factor antagonist ( <i>bldG</i> )                   | m    |      |
|                 | SGR3306 | putative anti-sigma factor                                     |      |      |
| SGR3340         | SGR3340 | putative WhiB-family transcriptional regulator ( <i>wblA</i> ) | m, s | 2    |
| SGR3399-SGR3398 | SGR3399 | hypothetical protein                                           |      | 2    |
|                 | SGR3398 | putative WD-repeat containing protein                          |      |      |
| SGR3520         | SGR3520 | putative acetyltransferase                                     |      |      |
| SGR3663         | SGR3663 | conserved hypothetical protein                                 |      |      |
| SGR3768         | SGR3768 | putative D-alanyl-D-alanine carboxypeptidase                   |      |      |
| SGR3840         | SGR3840 | conserved hypothetical protein                                 |      | 2, 3 |
| SGR3901         | SGR3901 | conserved hypothetical protein                                 |      |      |
| SGR3902         | SGR3902 | sporulation associated protein ORF1590                         | m    | 2    |
| SGR4011         | SGR4011 | putative CarD-like transcriptional regulator                   |      |      |
| SGR4021         | SGR4021 | putative integral membrane protein                             |      |      |
| SGR4086         | SGR4086 | conserved hypothetical protein                                 |      |      |
| SGR4151         | SGR4151 | <i>adsA</i>                                                    | m    | 1    |
| SGR4191         | SGR4191 | conserved hypothetical protein                                 |      |      |
| SGR4256         | SGR4256 | conserved hypothetical protein                                 |      |      |
| SGR4302         | SGR4302 | hypothetical protein                                           |      |      |
| SGR4396-SGR4392 | SGR4396 | putative sensor-like histidine kinase                          |      |      |
|                 | SGR4395 | conserved hypothetical protein                                 |      |      |
|                 | SGR4394 | conserved hypothetical protein                                 |      |      |
|                 | SGR4393 | putative ATP/GTP-binding protein                               |      |      |
|                 | SGR4392 | putative cytochrome P450                                       |      |      |
| SGR4807         | SGR4807 | putative LuxR-family transcriptional regulator                 |      |      |
| SGR4809         | SGR4809 | putative lantibiotic modifying enzyme                          | s    |      |
| SGR4898-SGR4901 | SGR4898 | hypothetical protein                                           |      |      |
|                 | SGR4899 | hypothetical protein                                           |      |      |
|                 | SGR4900 | hypothetical protein                                           |      |      |
|                 | SGR4901 | hypothetical protein                                           |      |      |
| SGR4921         | SGR4921 | conserved hypothetical protein                                 |      |      |
| SGR4961         | SGR4961 | conserved hypothetical protein                                 |      |      |
| SGR5028         | SGR5028 | hypothetical protein                                           |      |      |
| SGR5049         | SGR5049 | putative ArsR-family transcriptional regulator                 |      |      |
| SGR5072-SGR5075 | SGR5072 | conserved hypothetical protein                                 |      |      |
|                 | SGR5073 | conserved hypothetical protein                                 |      |      |
|                 | SGR5074 | conserved hypothetical protein                                 |      |      |
|                 | SGR5075 | hypothetical protein                                           |      |      |
| SGR5085         | SGR5085 | conserved hypothetical protein                                 |      |      |
| SGR5226         | SGR5226 | conserved hypothetical protein                                 |      |      |
| SGR5399         | SGR5399 | putative 5,10-methylenetetrahydrofolate reductase              |      |      |
| SGR5525         | SGR5525 | hypothetical protein                                           |      |      |
| SGR5762         | SGR5762 | <i>sprB</i>                                                    | p    | 1    |
| SGR5766         | SGR5766 | conserved hypothetical protein                                 |      |      |
| SGR5819         | SGR5819 | conserved hypothetical protein                                 |      |      |
| SGR5909         | SGR5909 | putative two-component system sensor kinase                    |      |      |
| SGR5914         | SGR5914 | <i>strU</i>                                                    | s    | 2    |

|                 |         |                                                                        |      |      |
|-----------------|---------|------------------------------------------------------------------------|------|------|
| SGR5922-SGR5923 | SGR5922 | <i>stsB</i>                                                            | s    |      |
|                 | SGR5923 | <i>stsA</i>                                                            | s    |      |
| SGR5931-SGR5932 | SGR5931 | <i>strR</i>                                                            | s    | 1, 2 |
|                 | SGR5932 | <i>aphD</i>                                                            | s    |      |
| SGR6043-SGR6044 | SGR6043 | putative elongation factor P                                           |      |      |
|                 | SGR6044 | putative transcription termination protein                             |      |      |
| SGR6071         | SGR6071 | putative LAL-subfamily transcriptional regulator ( <i>AdBS4-orf1</i> ) | s    | 1    |
| SGR6126-SGR6129 | SGR6126 | putative sensor-like histidine kinase                                  |      | 2    |
|                 | SGR6127 | conserved hypothetical protein                                         |      |      |
|                 | SGR6128 | conserved hypothetical protein                                         |      |      |
|                 | SGR6129 | putative ATP/GTP-binding protein                                       |      |      |
| SGR6153         | SGR6153 | conserved hypothetical protein                                         |      | 2    |
| SGR6286         | SGR6286 | putative regulatory protein                                            |      |      |
| SGR6383         | SGR6383 | gamma-butyrolactone-binding protein homologue                          |      | 2    |
| SGR6559-SGR6556 | SGR6559 | hypothetical protein ( <i>AdBS2-orf1</i> )                             |      | 1, 2 |
|                 | SGR6558 | hypothetical protein                                                   |      |      |
|                 | SGR6557 | hypothetical protein                                                   |      |      |
|                 | SGR6556 | putative permease of the major facilitator superfamily                 |      |      |
| SGR6710         | SGR6710 | putative peptide monooxygenase                                         |      |      |
| SGR6725         | SGR6725 | hypothetical protein                                                   |      |      |
| SGR6809         | SGR6809 | putative cyclic lipopeptide acylase                                    |      | 2, 3 |
| SGR6814         | SGR6814 | putative phenylacetate:CoA ligase                                      |      |      |
| SGR6856-SGR6857 | SGR6856 | conserved hypothetical protein                                         |      | 2    |
|                 | SGR6857 | hypothetical protein                                                   |      |      |
| trn42           | trn42   | <i>bldA</i>                                                            | m, s | 1    |

<sup>a</sup>m: involved in morphological differentiation, s: involved in secondary metabolism, p: extracellular protease

<sup>b</sup>1: category-I target (see text), 2: target suggested by Hara *et al.* (reference 5 in the main text)

3: target suggested by Akanuma *et al.* (reference 6 in the main text)

*SGR1270* (*eshA*), which should be included in the list by our criteria, is omitted, because we have revealed that AdpA indirectly activates this gene.<sup>8</sup>

**Supplemental Table S4.** List of genes that are probably activated directly by AdpA, specifically in solid culture.

| transcriptional unit | gene at the top of unit |                                                                                       | identified previously <sup>a</sup> |
|----------------------|-------------------------|---------------------------------------------------------------------------------------|------------------------------------|
|                      | ID                      | description                                                                           |                                    |
| SGR13t               | SGR13t                  | hypothetical protein                                                                  |                                    |
| SGR85t               | SGR85t                  | hypothetical protein                                                                  |                                    |
| SGR96t               | SGR96t                  | hypothetical protein                                                                  |                                    |
| SGR296-SGR295        | SGR296                  | conserved hypothetical protein                                                        | 2                                  |
| SGR654               | SGR654                  | putative MbtH-like protein                                                            |                                    |
| SGR684               | SGR684                  | hypothetical protein                                                                  |                                    |
| SGR815-SGR810        | SGR815                  | conserved hypothetical protein (in putative NRPS-type-I PKS gene cluster)             |                                    |
| SGR977               | SGR977                  | putative isopentenyl diphosphate isomerase                                            |                                    |
| SGR1067              | SGR1067                 | conserved hypothetical protein                                                        |                                    |
| SGR1227              | SGR1227                 | hypothetical protein                                                                  |                                    |
| SGR1241              | SGR1241                 | <i>sprT</i>                                                                           | 1                                  |
| SGR1508              | SGR1508                 | conserved hypothetical protein                                                        |                                    |
| SGR1726              | SGR1726                 | putative ppGpp synthetase/hydrolase ( <i>relA2</i> )                                  |                                    |
| SGR1773              | SGR1773                 | putative two-component system sensor kinase                                           |                                    |
| SGR1813              | SGR1813                 | putative transcriptional termination/antitermination factor ( <i>nusA</i> )           |                                    |
| SGR1818              | SGR1818                 | putative proline tRNA synthetase                                                      |                                    |
| SGR1999-SGR1997      | SGR1999                 | putative acetolactate synthase subunit small                                          |                                    |
| SGR2097              | SGR2097                 | putative glycogen phosphorylase                                                       |                                    |
| SGR2107-SGR2108      | SGR2107                 | putative two-component system sensor kinase                                           |                                    |
| SGR2318              | SGR2318                 | conserved hypothetical protein                                                        |                                    |
| SGR2344              | SGR2344                 | conserved hypothetical protein                                                        |                                    |
| SGR2403              | SGR2403                 | conserved hypothetical protein                                                        |                                    |
| SGR2456              | SGR2456                 | conserved hypothetical protein                                                        | 2                                  |
| SGR2564              | SGR2564                 | putative transcription elongation factor                                              |                                    |
| SGR3616              | SGR3616                 | putative regulatory protein                                                           |                                    |
| SGR3617              | SGR3617                 | conserved hypothetical protein                                                        |                                    |
| SGR3655              | SGR3655                 | <i>ssgA</i>                                                                           | 1                                  |
| SGR3841              | SGR3841                 | hypothetical protein                                                                  |                                    |
| SGR3861              | SGR3861                 | conserved hypothetical protein                                                        |                                    |
| SGR3904              | SGR3904                 | conserved hypothetical protein                                                        |                                    |
| SGR3933              | SGR3933                 | putative phosphate-binding protein precursor ( <i>pstS</i> )                          |                                    |
| SGR4170              | SGR4170                 | hypothetical protein                                                                  |                                    |
| SGR4190              | SGR4190                 | hypothetical protein                                                                  |                                    |
| SGR4618              | SGR4618                 | conserved hypothetical protein ( <i>AdBS3-orfA</i> )                                  | 1                                  |
| SGR4706              | SGR4706                 | hypothetical protein                                                                  |                                    |
| SGR4736-SGR4737      | SGR4736                 | putative cellobiose ABC transporter permease protein                                  |                                    |
| SGR4983              | SGR4983                 | putative 30S ribosomal protein S20                                                    |                                    |
| SGR5348              | SGR5348                 | hypothetical protein                                                                  |                                    |
| SGR5506              | SGR5506                 | <i>sprU</i>                                                                           | 1                                  |
| SGR5613              | SGR5613                 | conserved hypothetical protein                                                        |                                    |
| SGR5635-SGR5632      | SGR5635                 | putative L-2,4-diaminobutyrate acetyltransferase ( <i>ectA</i> )                      |                                    |
| SGR5765              | SGR5765                 | hypothetical protein                                                                  |                                    |
| SGR5767              | SGR5767                 | hypothetical protein                                                                  |                                    |
| SGR5973              | SGR5973                 | putative glycerophosphoryl diester phosphodiesterase                                  | 3                                  |
| SGR6073-SGR6078      | SGR6073                 | putative type-I PKS                                                                   |                                    |
| SGR6209-SGR6208      | SGR6209                 | putative carbonic anhydrase                                                           |                                    |
| SGR6257              | SGR6257                 | conserved hypothetical protein                                                        |                                    |
| SGR6451              | SGR6451                 | conserved hypothetical protein                                                        |                                    |
| SGR6586              | SGR6586                 | putative carbonic anhydrase                                                           |                                    |
| SGR6615-SGR6618      | SGR6615                 | putative ABC-type Fe <sup>3+</sup> -siderophore transporter substrate-binding protein |                                    |
| SGR6691-SGR6693      | SGR6691                 | putative DNA polymerase III alpha subunit                                             |                                    |
| SGR6806-SGR6805      | SGR6806                 | conserved hypothetical protein                                                        |                                    |
| SGR6807              | SGR6807                 | hypothetical protein                                                                  |                                    |
| SGR7011              | SGR7011                 | hypothetical protein                                                                  | 2                                  |

<sup>a</sup>1: category-I target (see text), 2: target suggested by Hara *et al.* (reference 5 in the main text), 3: target suggested by Akanuma *et al.* (reference 6 in the main text)



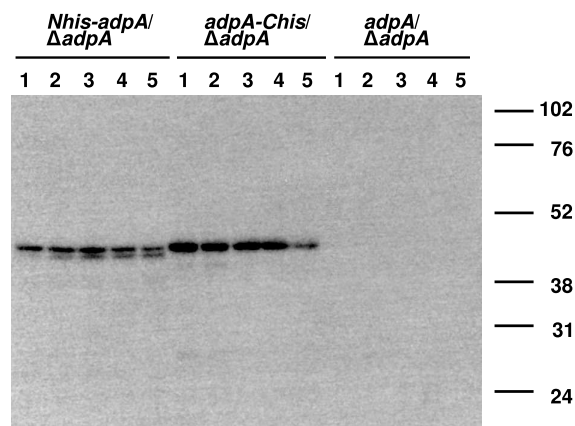

**Supplemental Figure S1. Changes in amount of polyHis-tagged AdpA in solid culture.** The strains were grown on YMPD agar. Total protein was extracted at 24 (lane 1), 36 (lane 2), 48 (lane 3), 60 (lane 4), and 72 (lane 5) h and 6  $\mu$ g of each was electrophoresed and subjected to western blotting analysis with anti-polyHis-tag antibody.

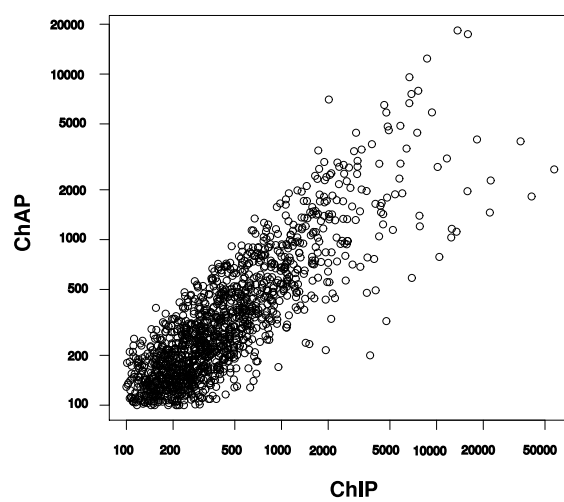

**Supplemental Figure S2. Comparison of signals of peaks between ChIP-seq and ChAP-seq.**

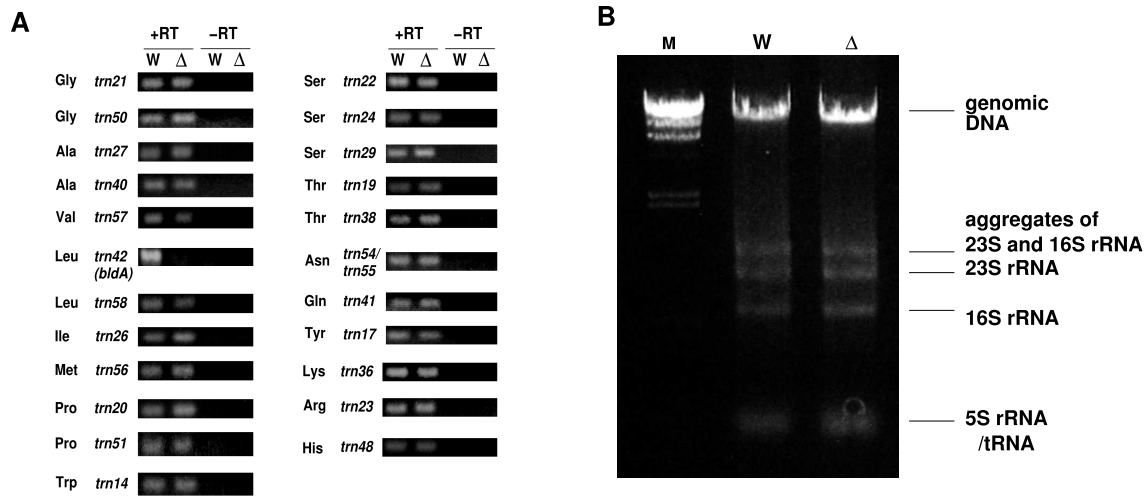

**Supplemental Figure S3. Expression analysis of tRNA and rRNA genes in the mycelia grown for 18 h in liquid culture.** (A) For tRNA genes that have one in vivo AdpA-binding site in their “putative regulatory region”, expression levels were examined by semi quantitative RT-PCR in the N-His-AdpA-producing  $\Delta adpA$  strain (*Nhis-adpA*/ $\Delta adpA$ ), as well as the control  $\Delta adpA$  strain (*pTYM19*/ $\Delta adpA$ ). Control experiments with no reverse transcriptase (–RT) confirmed that the RNA samples contained no chromosomal DNA. Contrary to our expectation, 23 tRNA genes consisting of 22 transcriptional units were similarly expressed in both the strains, indicating that they were not regulated by AdpA. However, the expression level of *trn42 (bldA)* was considerably higher in N-His-AdpA-producing strain than in the control  $\Delta adpA$  strain. (B) All six rRNA operons (16S-23S-5S) have two AdpA-binding sites in each “putative regulatory region”; one is approximately 200 bp upstream from one of the transcriptional start points of the rRNA operon and the other is near the 5’ end of the transcripts. Among six rRNA operons, the former regions are different from each other, while the latter regions are identical. We also compared the amount of rRNA between the N-His-AdpA-producing *adpA* strain and the control  $\Delta adpA$  strain. To use the genomic DNA as an internal control, total RNA was extracted together with genomic DNA. The nucleic acid sample was subjected to agarose gel electrophoresis followed by ethidium bromide staining. No difference in the amount of rRNA between the strains was detected, indicating that these rRNA operons are not regulated by AdpA. W; NHis-AdpA producing  $\Delta adpA$  strain (*Nhis-adpA*/ $\Delta adpA$ ),  $\Delta$ ;  $\Delta adpA$  strain with the empty vector *pTYM19* (*pTYM19*/ $\Delta adpA$ ), M;  $\lambda$ -HindIII molecular weight marker. [Additional Information] Seven small RNA genes also have one in vivo AdpA-binding site in their “putative regulatory region”. Our previous study showed that two of them (*sgs3618* and *sgs5362*) were downregulated in the  $\Delta adpA$  strain compared to the wild-type strain on solid medium. However, recombinant AdpA-C-His did not bind to the upstream regions of these two sRNA genes in vitro.<sup>9</sup> The AdpA-dependency of *sgs3618* and *sgs5362* remained to be confirmed. The remaining five sRNA genes were unlikely to be regulated by AdpA.<sup>9</sup>

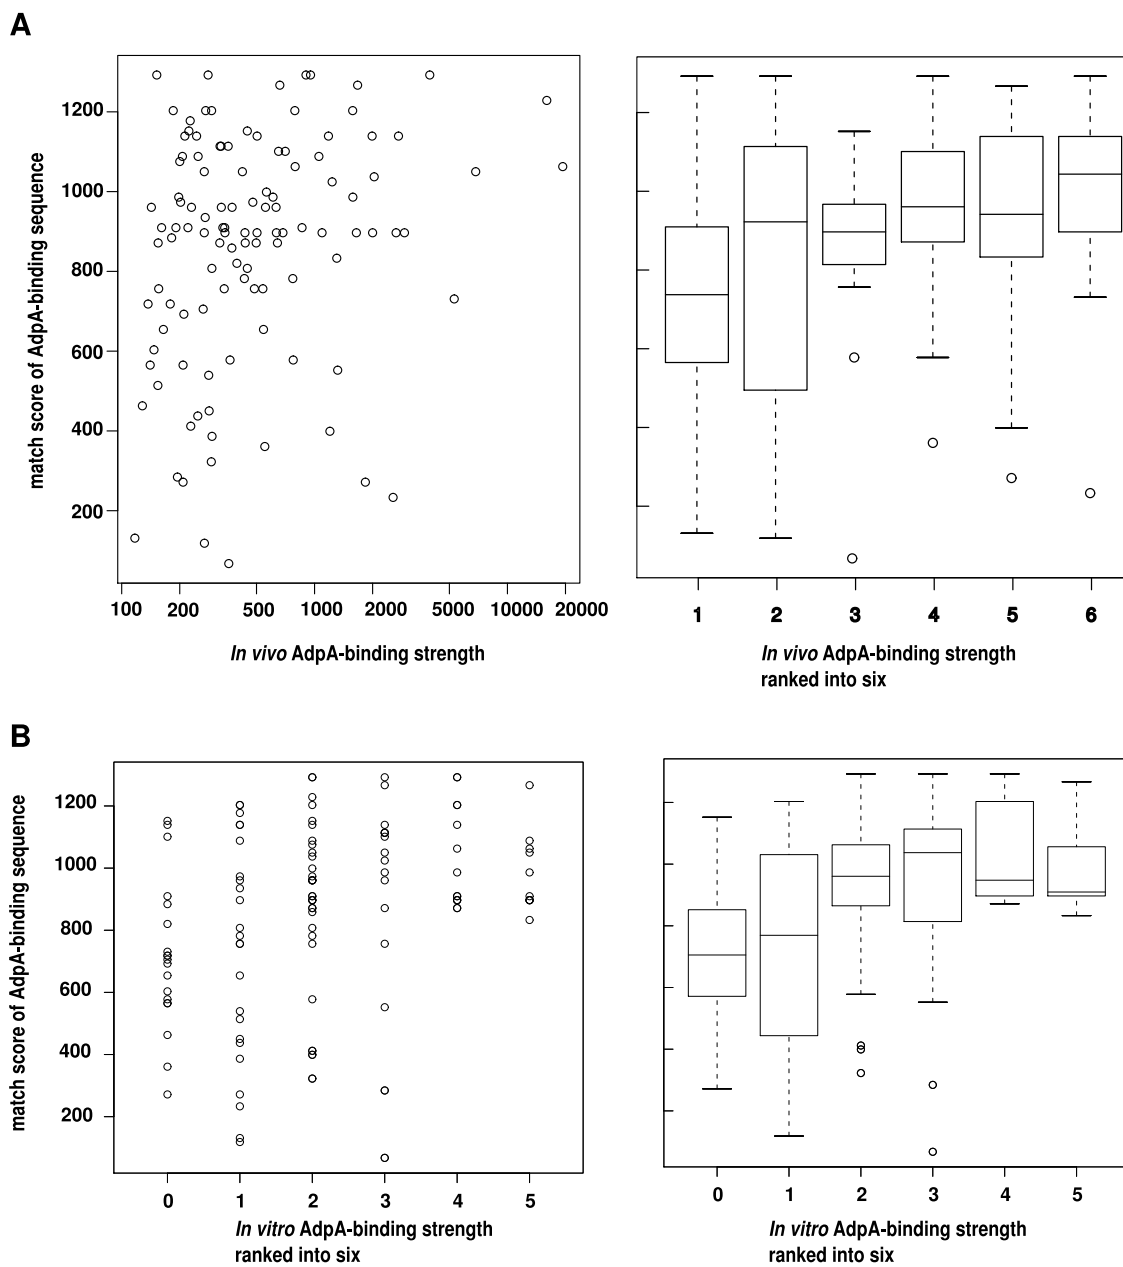

**Supplemental Figure S4. Comparison of “match score” of AdpA-binding sequences to AdpA-binding strength *in vivo* (A) and *in vitro* (B).** Left graphs are scatter plots and right graphs are box plots (see the legend for Fig. 4). In the box plot (A), *in vivo* AdpA-binding strength is ranked into six categories; 1,  $\leq 200$ ; 2,  $\leq 300$ ; 3,  $\leq 500$ ; 4,  $\leq 1000$ ; 5,  $\leq 2000$ ; 6,  $> 2000$ .

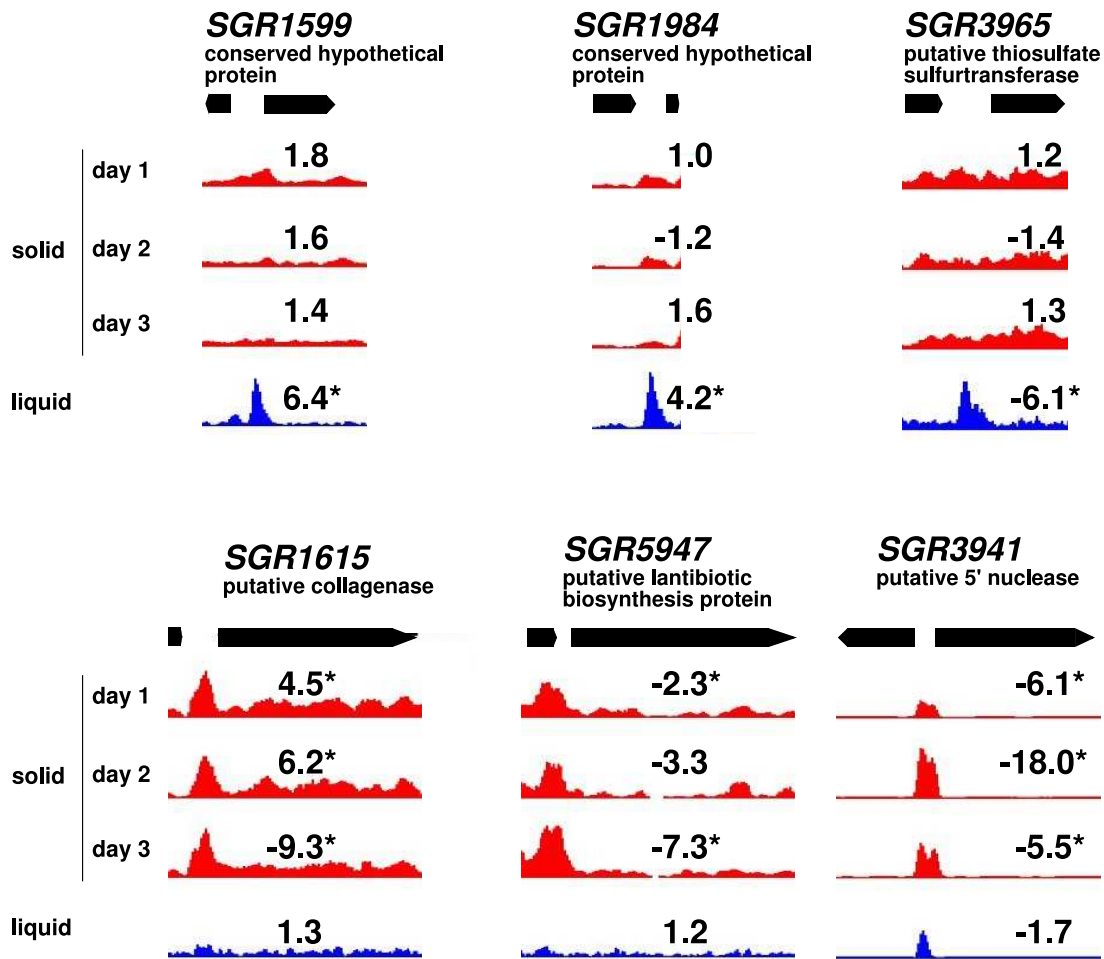

**Supplemental Figure S5. Six “relevant” AdpA-binding sites specifically bound in liquid (upper) or solid (lower) culture.** Fold change in transcriptome analysis (*Nhis-*adpA*/Δ*adpA** vs. pTYM19/Δ*adpA*) is also shown (data with a p-value by Student’s *t*-test < 0.05 are indicated by \*). The “apparently relevant” liquid culture-specific AdpA-binding sites seemed to be involved in the regulation of *SGR1599*, *SGR1984*, and *SGR3965*. On the other hand, the “apparently relevant” solid culture-specific AdpA-binding sites seemed to be involved in the regulation of *SGR1615*, *SGR5947*, and *SGR3941*. Biological significance of the liquid or solid culture-specific regulation of these genes by AdpA is unknown.

## References

1. Higo, A., Horinouchi, S., and Ohnishi, Y. 2011, Strict regulation of morphological differentiation and secondary metabolism by a positive feedback loop between two global regulators AdpA and BldA in *Streptomyces griseus*, *Mol. Microbiol.*, **81**, 1607–1622.
2. Onaka, H., Taniguchi, S., Ikeda, H., Igarashi, Y., and Furumai, T. 2003, pTOYAMAcos, pTYM18, and pTYM19, actinomycete-*Escherichia coli* integrating vectors for heterologous gene expression, *J. Antibiot.*, **56**, 950–956.
3. Horinouchi, S., Kumada, Y., and Beppu, T. 1984, Unstable genetic determinant of A-factor biosynthesis in streptomycin-producing organisms: cloning and characterization, *J. Bacteriol.*, **158**, 481–487.
4. Bailey, T. L. and Gribskov, M. 1998, Methods and statistics for combining motif match scores, *J. Comput. Biol.*, **5**, 211–221.
5. Yamazaki, H., Tomono, A., Ohnishi, Y., and Horinouchi, S. 2004, DNA-binding specificity of AdpA, a transcriptional activator in the A-factor regulatory cascade in *Streptomyces griseus*, *Mol. Microbiol.*, **53**, 555–572.
6. Yamazaki, H., Ohnishi, Y., and Horinouchi, S. 2000, An A-factor-dependent extracytoplasmic function sigma factor ( $\sigma^{\text{AdsA}}$ ) that is essential for morphological development in *Streptomyces griseus*, *J. Bacteriol.*, **182**, 4596–4605.
7. Hara, H., Ohnishi, Y., and Horinouchi, S. 2009, DNA microarray analysis of global gene regulation by A-factor in *Streptomyces griseus*, *Microbiology*, **155**, 2197–2210.
8. Tezuka, T., Ohnishi, Y., and Horinouchi, S. 2010, Conditional effect of the deletion

of *eshA* on streptomycin production in *Streptomyces griseus* IFO13350, *Actinomycetologica*, **24**, 45–50.

9. Tezuka, T., Hara, H., Ohnishi, Y., and Horinouchi, S. 2009, Identification and gene disruption of small noncoding RNAs in *Streptomyces griseus*, *J. Bacteriol.*, **191**, 4896–4904.
